# Supplementary material for: Defining the Role of Isoeugenol from Ocimum tenuiflorum against Diabetes Mellitus-Linked Alzheimer’s Disease through Network Pharmacology and Computational Methods
Source: MDPI journal article supplement (doi:10.3390/molecules27082398), 2022-04-07
Supplement: s1 [file s1]

## Supplementary material

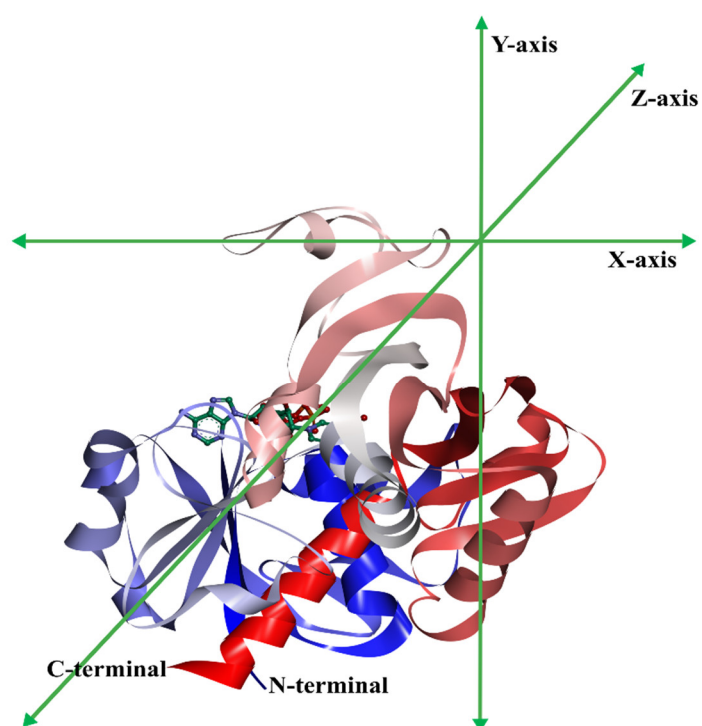

**A**

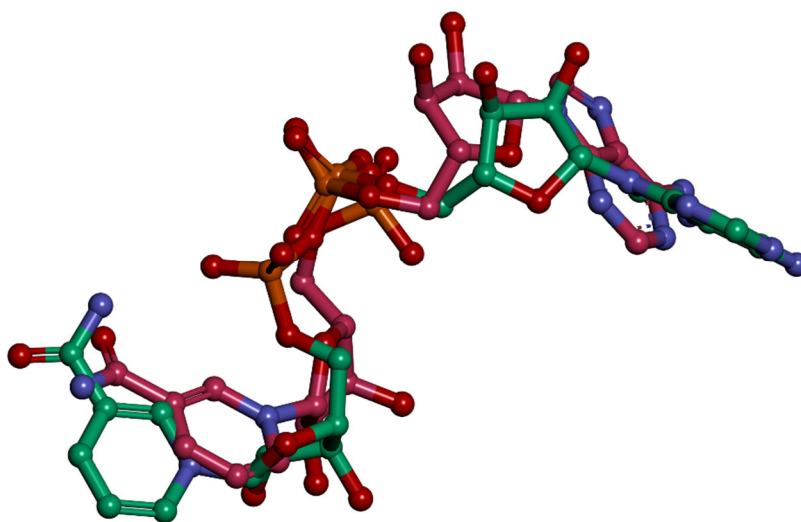

**B**

**Figure S1:** A) Structural details of protein GAPDH (PDB ID: 1U8F) bound to its co-crystallized NAD<sup>+</sup> cofactor. N-terminal of the protein is highlighted in blue, whereas the red terminal is highlighted in red. B) Result from the validation of the docking protocol: Crystallized and bound NAD<sup>+</sup> (green) complexed with re-docked NAD<sup>+</sup> (red) with an RMSD of 2.10 Å.

| Residues bound with NAD <sup>+</sup> | Compounds  |   |   |         |   |   |
|--------------------------------------|------------|---|---|---------|---|---|
|                                      | Isoeugenol |   |   | Myrcene |   |   |
|                                      |            |   |   |         |   |   |
| ASN 9                                | 0          | 0 | 0 | 0       | 0 | 0 |
| GLY 10                               | 0          | 0 | 0 | 0       | 0 | 0 |
| GLY 12                               | 1          | 0 | 0 | 0       | 0 | 0 |
| ARG 13                               | 1          | 2 | 0 | 0       | 0 | 0 |
| ILE 14                               | 0          | 2 | 0 | 0       | 0 | 2 |
| ASP 35                               | 0          | 0 | 0 | 0       | 0 | 0 |
| PRO 36                               | 0          | 0 | 0 | 0       | 0 | 0 |
| PHE 37                               | 0          | 0 | 0 | 0       | 0 | 0 |
| ARG 80                               | 0          | 0 | 0 | 0       | 0 | 0 |
| SER 98                               | 1          | 0 | 0 | 0       | 0 | 0 |
| THR 99                               | 0          | 0 | 0 | 0       | 0 | 0 |
| GLY 100                              | 0          | 0 | 0 | 0       | 0 | 0 |
| SER 122                              | 0          | 0 | 0 | 0       | 0 | 0 |
| CYS 152                              | 0          | 0 | 0 | 0       | 0 | 0 |
| ASN 316                              | 0          | 0 | 0 | 0       | 0 | 0 |
| TYR 320                              | 0          | 0 | 0 | 0       | 0 | 0 |
| Occupancy (%)                        | 43.75      |   |   | 12.5    |   |   |

|  |                |
|--|----------------|
|  | Hydrogen bonds |
|  | Pi-alkyl bonds |
|  | Alkyl bonds    |

**Figure S2:** Protein-ligand fingerprinting of isoeugenol and myrcene docked with GAPDH.
